# Supplementary material for: Simultaneous activation of parallel sensory pathways promotes a grooming sequence in Drosophila
Source: eLife journal article supplement (doi:10.7554/elife.28804), 2017-09-09
Supplement: figures [file elife-28804-figures-v2.pdf]

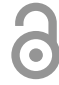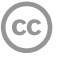

---

## Figures and figure supplements

Simultaneous activation of parallel sensory pathways promotes a grooming sequence in *Drosophila*

**Stefanie Hampel et al**

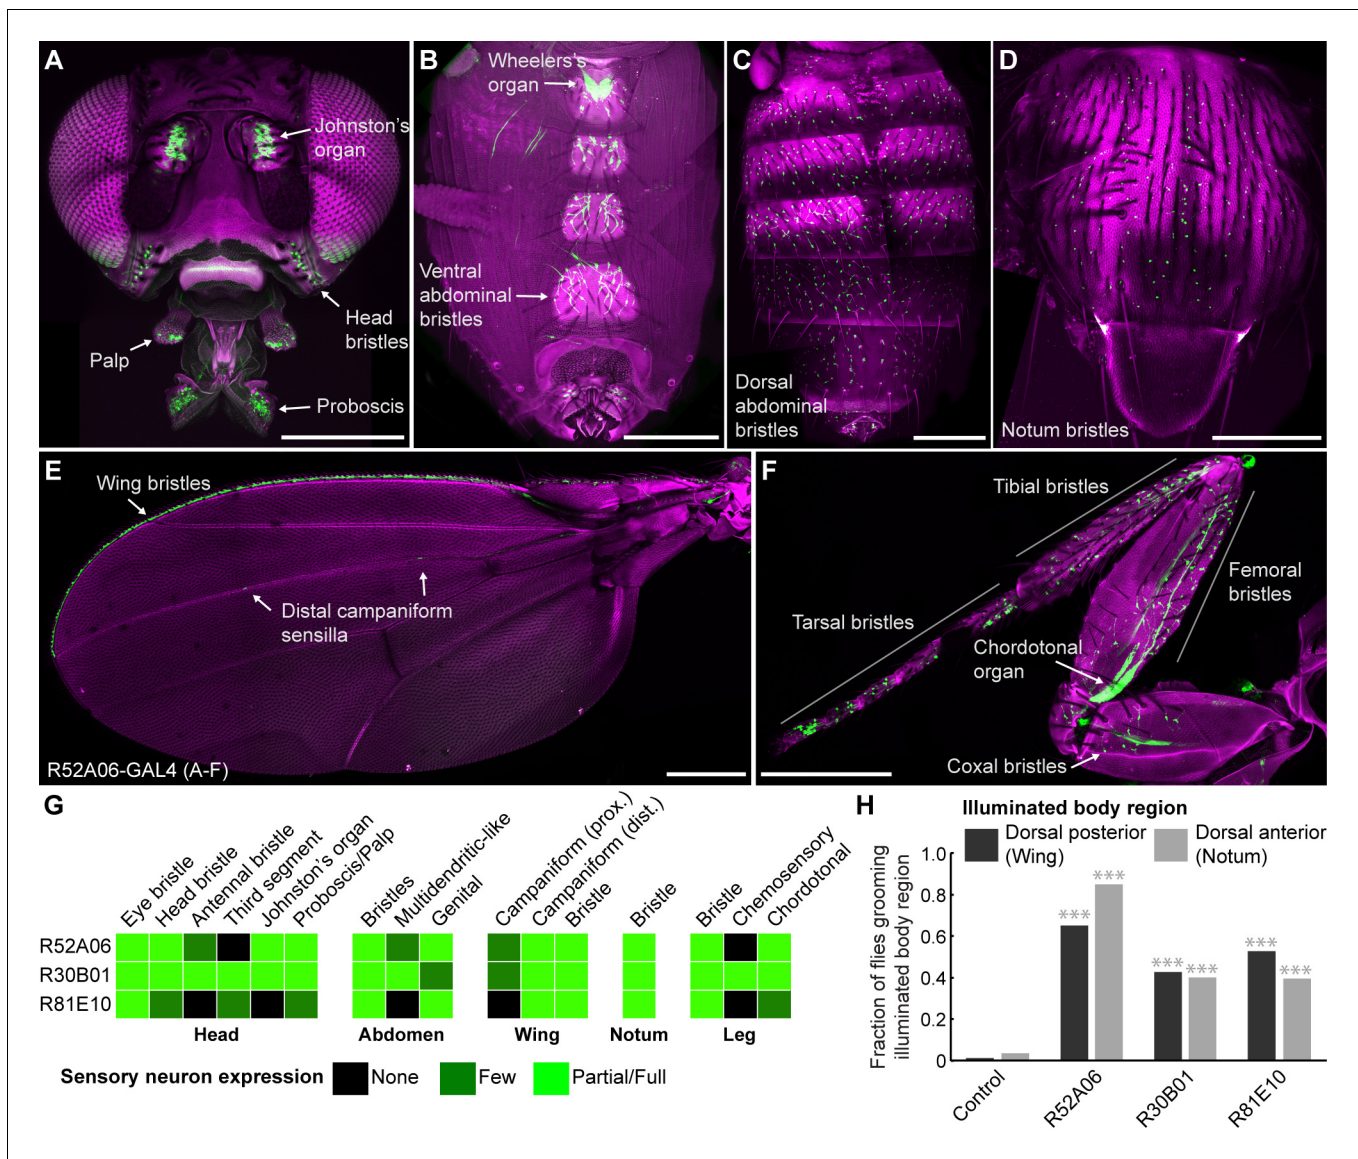

**Figure 1.** GAL4 lines expressing in sensory neurons whose activation elicits grooming. (A–E) Peripheral expression pattern of R52A06-GAL4 expressing green fluorescent protein (GFP). Confocal maximum projections are shown. Sensory neurons are in green and autofluorescence from the cuticle is in magenta. Body parts shown are: (A) head, (B) ventral abdomen, (C) dorsal abdomen, (D) notum, (E) wing, and (F) prothoracic leg. Labeled arrows indicate specific sensory classes. In (C) and (D) all GFP positive cells are bristle mechanosensory neurons. Scale bars, 250  $\mu$ m. (G) Summary table of the expression patterns of R52A06-, R30B01-, and R81E10-GAL4 in sensory neurons on each indicated body part. (H) Grooming responses to optogenetic activation of sensory neurons targeted by different GAL4 lines expressing ChR2. An optical fiber connected to an LED was used to direct light to the dorsal surface of the anterior or posterior body (Figure 1—figure supplement 2). The fraction of flies that showed a grooming response to the blue light-illuminated body region is plotted ( $n \geq 40$  trials for each body part). Grey shades and labels indicate the region that was illuminated. Chi-squared test, Asterisks:  $p < 0.0001$ . See Video 1 and Video 2 for representative examples.

DOI: <https://doi.org/10.7554/eLife.28804.002>

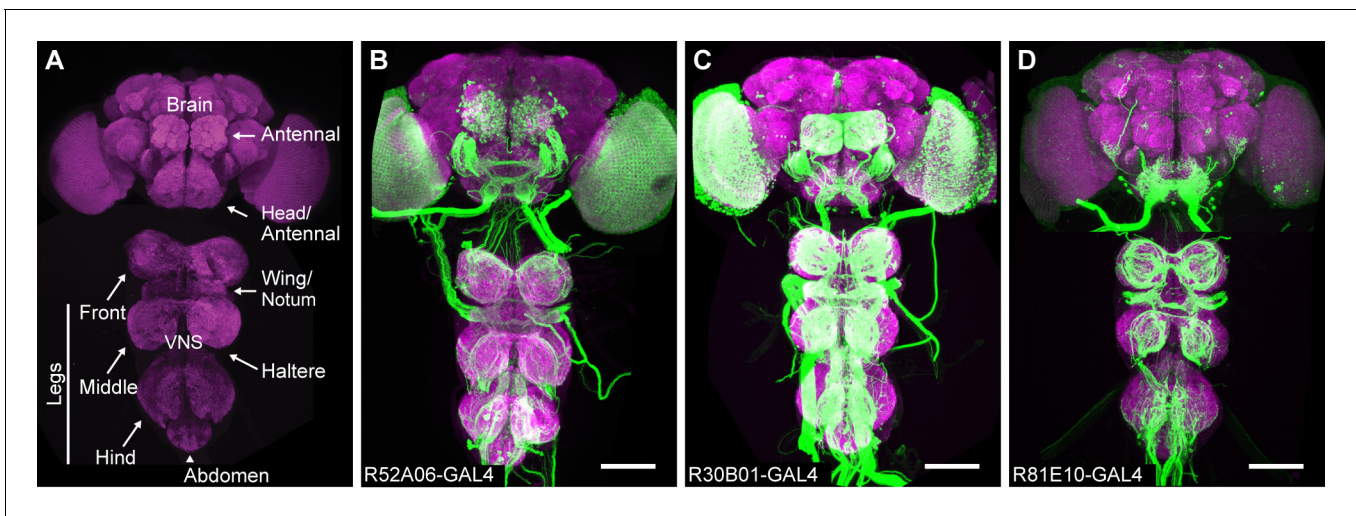

**Figure 1—figure supplement 1.** Anatomy of sensory GAL4 lines. (A) Sensory neurons project their axons (afferents) to specific regions of the *central nervous system* (CNS) depending on which body part they are from. The neuropile of the CNS visualized with anti-Bruchpilot (magenta). A confocal image maximum projection is shown. (B–D) Three different GAL4 lines expressing GFP in afferent projections from the different body parts. GFP was visualized with anti-GFP antibodies (green). Scale bar, 100  $\mu$ m. GAL4 lines shown are R52A06-GAL4 (B), R30B01-GAL4 (C), and R81E10-GAL4 (D).

DOI: <https://doi.org/10.7554/eLife.28804.003>

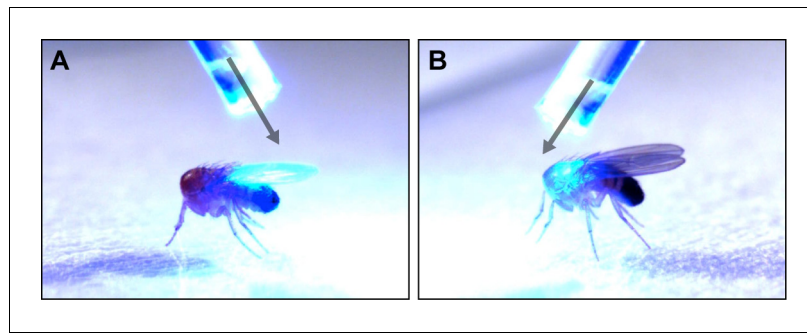

**Figure 1—figure supplement 2.** Optogenetic illumination of sensory neurons on different body regions. (A–B) A fiber optic probe that was connected to a blue light LED was used to direct light to specific body regions. Images show illumination of the posterior (A) or anterior (B) dorsal surfaces of decapitated flies. See **Video 1** and **Video 2** for representative examples.

DOI: <https://doi.org/10.7554/eLife.28804.004>

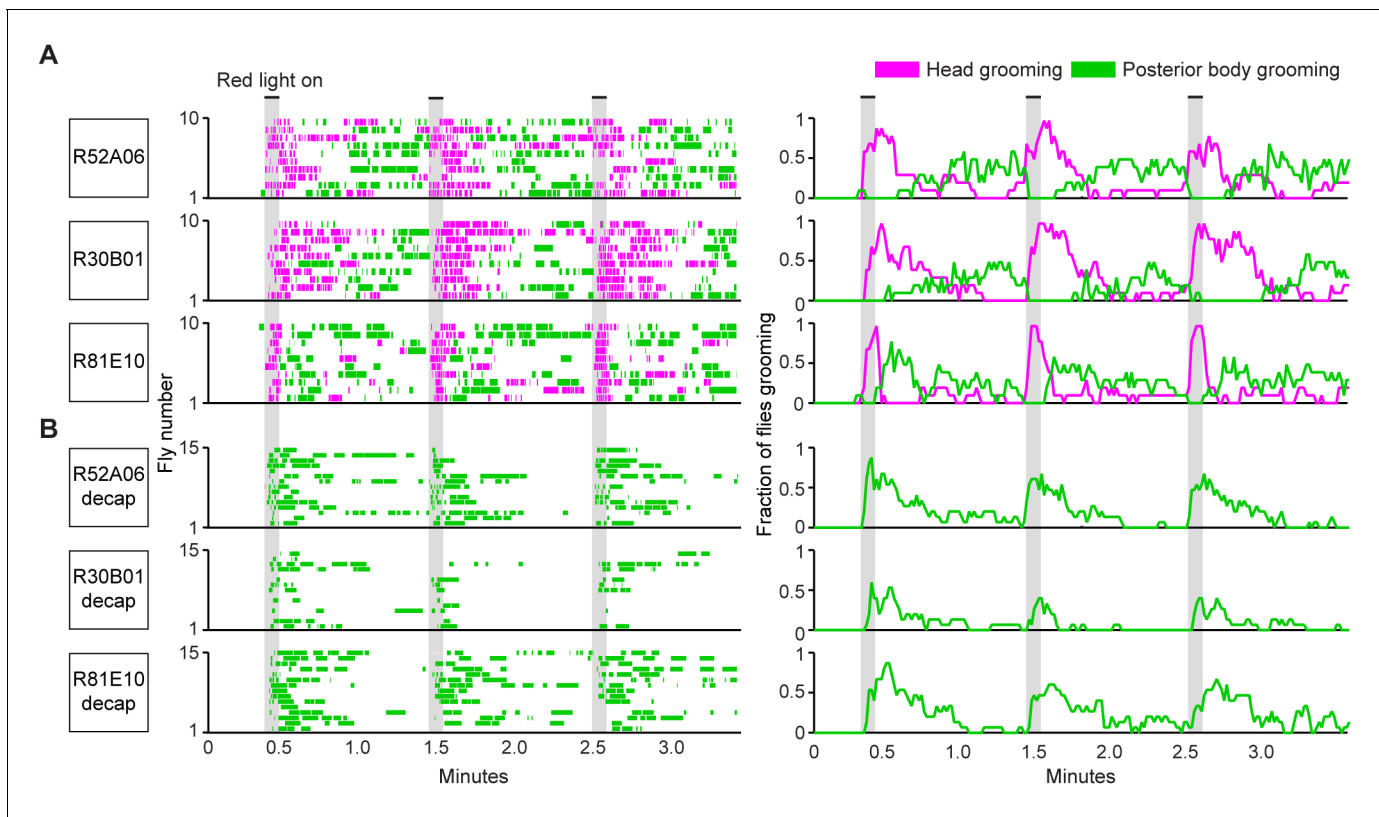

**Figure 2.** Simultaneous optogenetic activation of body sensory neurons elicits sequential grooming. (A–B) Head (magenta) or posterior body grooming movements (green) elicited with red light-illumination of R52A06-, R30B01-, and R81E10-GAL4 flies expressing CsChrimson. The movements are mutually exclusive. Ethograms of ten individual flies are stacked for each line (left). Histograms show the fraction of flies that were performing specific grooming movements within one-second time bins (right). Gray bars indicate five second presentations of red light. (A) Grooming movements performed by intact flies. (B) Grooming movements performed by decapitated flies. See [Video 3](#), [Video 4](#), and [Video 5](#) for representative examples. Red light illumination of control flies did not elicit grooming ([Figure 2—figure supplement 1](#)).

DOI: <https://doi.org/10.7554/eLife.28804.007>

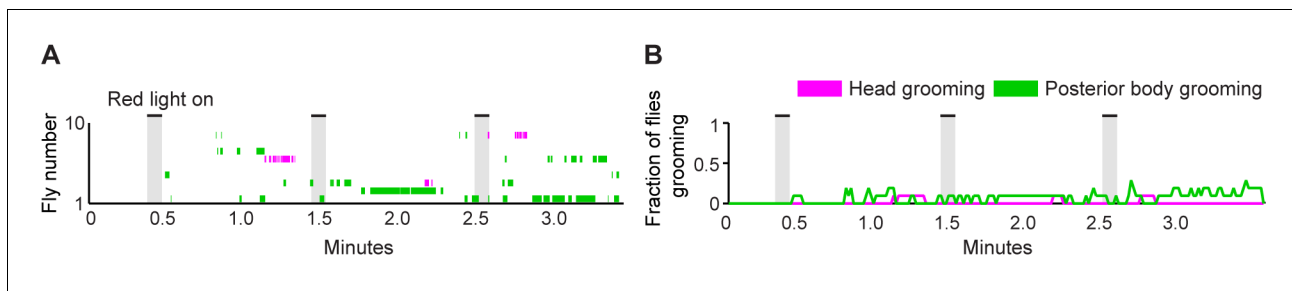

**Figure 2—figure supplement 1.** Illumination of control flies does not elicit grooming. (A) Ethograms showing head (magenta) or posterior body grooming (green) with red light-illumination of control flies. Ethograms of individual flies are stacked on top of each other. (B) Histogram shows the fraction of flies that were performing each grooming movement within one-second time bins. Gray bars indicate a five second presentation of red light. This is the control for the experiment shown in **Figure 2**.

DOI: <https://doi.org/10.7554/eLife.28804.008>

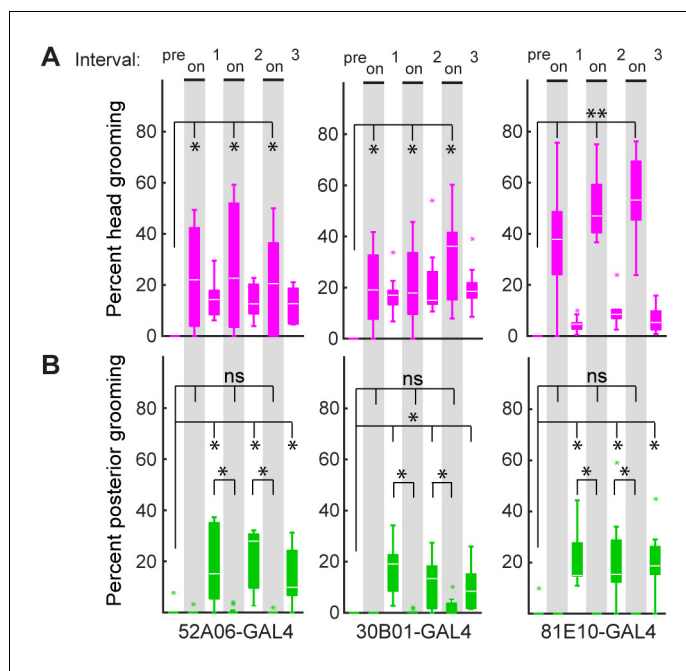

**Figure 2—figure supplement 2.** Simultaneous optogenetic activation of body sensory neurons elicits a prioritized head grooming response. (A–B) Box plots show the percent time flies spent performing head (A) or posterior grooming (B) with optogenetic activation of neurons targeted by 52A06-, 30B01-, and 81E10-GAL4 (from experiment shown in **Figure 2A**). Plotted time bins include the period before the optogenetic stimulus (pre), the three optogenetic stimuli (on), and the three post stimulus rest periods (1–3). Bottom and top of the boxes indicate the first and third quartiles respectively; the white line specifies median; whiskers show the upper and lower 1.5 IQR; magenta and green asterisks indicate data outliers (n = 10 for each box). Black asterisks show \*p < 0.05, \*\*p < 0.01, Friedman test followed by post-hoc Wilcoxon signed rank test for pairwise comparisons with Bonferroni-Holm correction for multiple comparisons.

DOI: <https://doi.org/10.7554/eLife.28804.009>

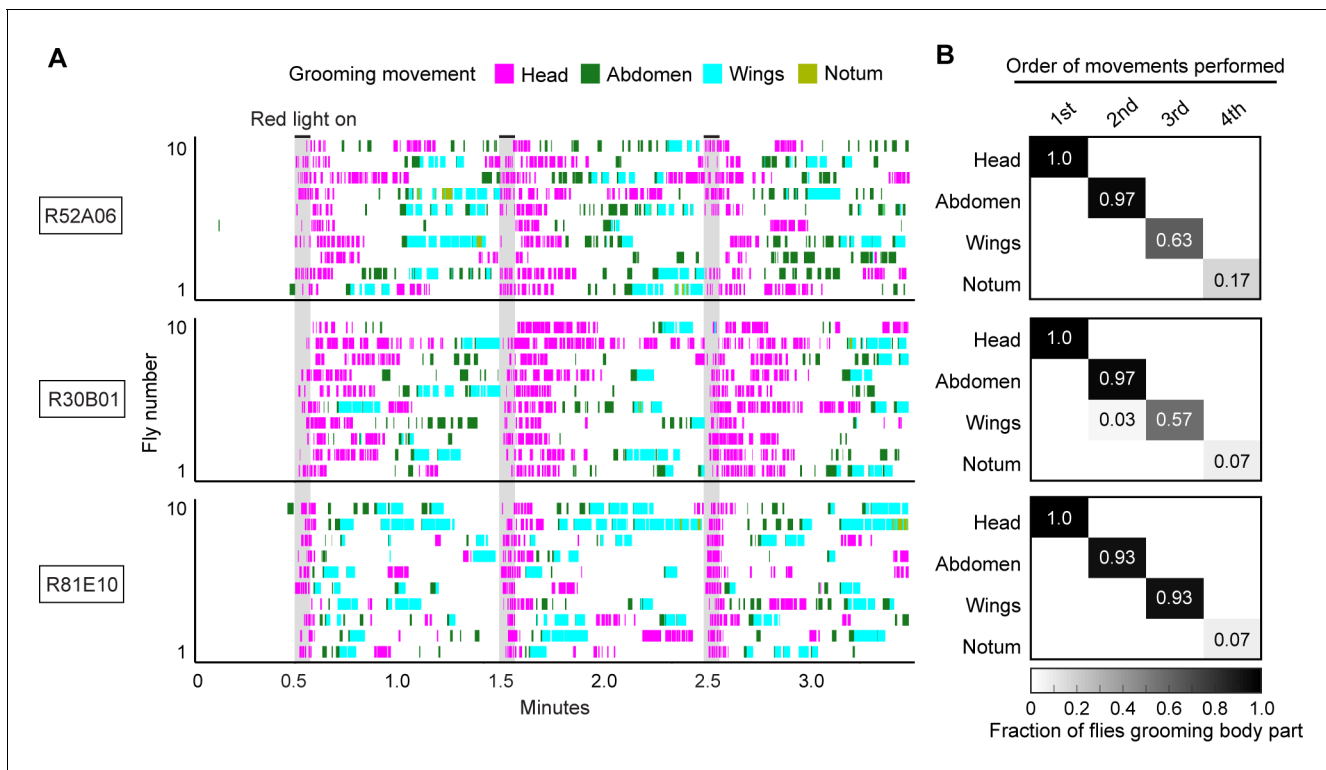

**Figure 2—figure supplement 3.** Simultaneous optogenetic activation of body sensory neurons elicits a grooming sequence. (A) Ethograms showing different grooming movements elicited with red light-illumination of R52A06-, R30B01-, or R81E10-GAL4 flies expressing CsChrimson. Ethograms of ten individual flies are stacked for each GAL4 line. Gray bars indicate five-second presentations of a red light stimulus. Colors indicating the grooming movements are shown above the ethograms. The same ethograms with binned head and posterior grooming movements are shown in **Figure 2A**. (B) Grids show the fraction of flies performing a specific grooming movement as their first, second, third, or fourth novel movement from the onset of the red light stimulation until the beginning of the next red light stimulus. The fraction of flies performing notum grooming is low because most flies did not perform that grooming movement. Notum grooming was similarly rare with dust induced grooming (Seeds et al., 2014).

DOI: <https://doi.org/10.7554/eLife.28804.010>

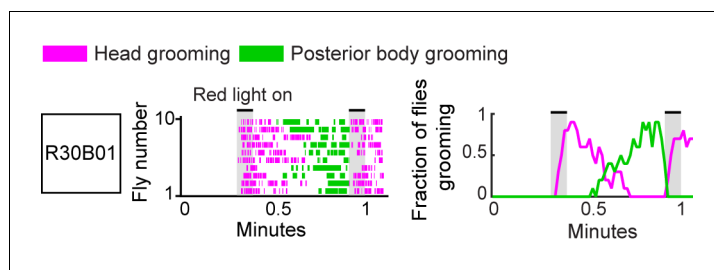

**Figure 2—figure supplement 4.** Simultaneous optogenetic activation of body sensory neurons elicits eye grooming and terminates ongoing posterior grooming. Head (magenta) or posterior body grooming (green) elicited with red light-illumination of R30B01-GAL4 flies expressing CsChrimson. Only flies that performed posterior body grooming at the moment of the second stimulus are plotted. Ethograms of ten individual flies are stacked (left). Histograms show the fraction of flies that were performing specific grooming movements within one-second time bins (right). Gray bars indicate five-second presentations of red light. Intervals between the optogenetic stimulations are 30 s, compared to 60 s in **Figure 2**.

DOI: <https://doi.org/10.7554/eLife.28804.011>

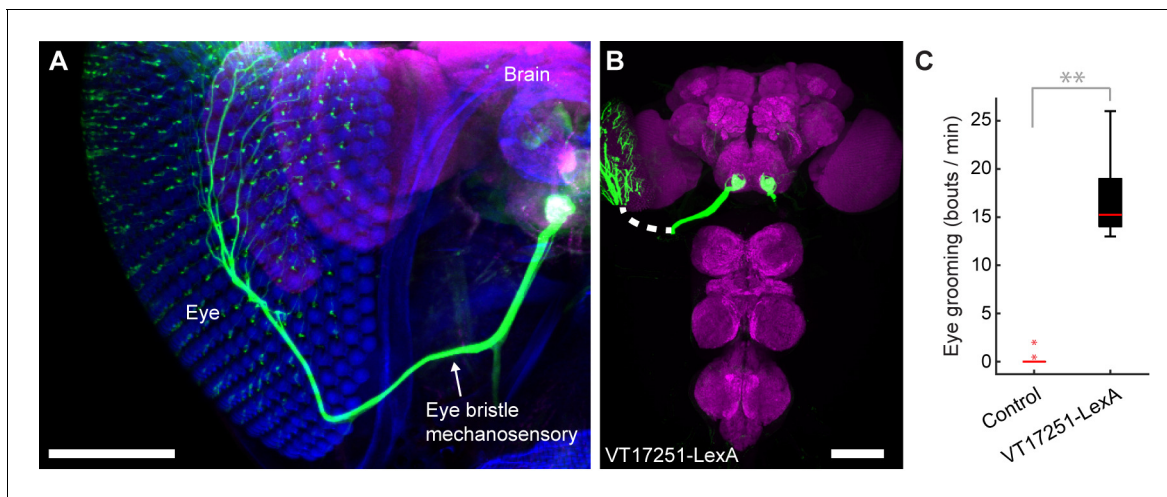

**Figure 3.** Interommatidial bristle mechanosensory neurons elicit eye grooming. (A–B) The expression pattern of VT17251-LexA in eye bristle mechanosensory neurons. The neurons were stained with anti-GFP (green) and the brain neuropile is stained with anti-Bruchpilot (magenta). Both images are maximum intensity projections. Scale bars, 100  $\mu$ m. (A) Expression pattern shown in the semi-intact head. The eye and head cuticle is shown in blue. (B) Expression pattern in the CNS. White dashed line indicates the trajectory of eye bristle mechanosensory neuron axons found from the more intact preparations in (A). (C) Eye grooming bout rate with optogenetic activation of neurons targeted by VT17251-LexA. Bottom and top of the boxes indicate the first and third quartiles respectively; median is the red line; whiskers show the upper and lower 1.5 IQR; red dots are data outliers (n = 10 for each box; asterisks show  $p < 0.001$ , Kruskal-Wallis and post hoc Mann-Whitney U pairwise test).

DOI: <https://doi.org/10.7554/eLife.28804.015>

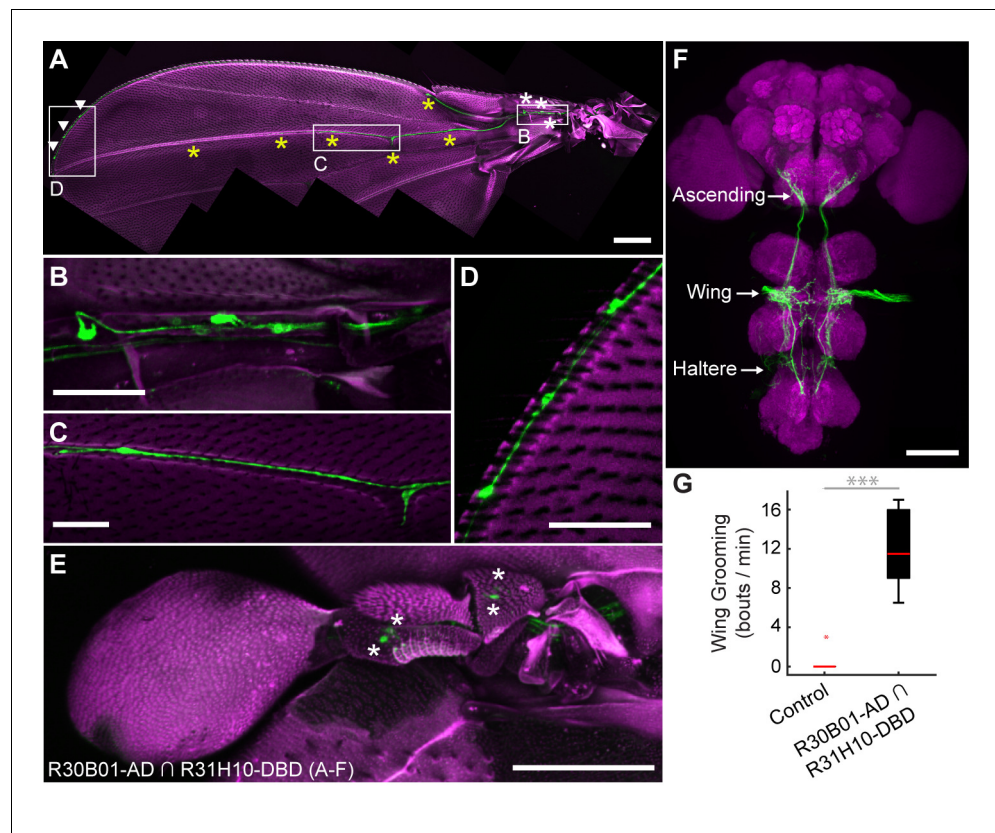

**Figure 4.** spGAL4 driver that expresses in wing and haltere sensory neurons whose activation elicits wing grooming. (A–E) The expression pattern of R30B01-AD  $\cap$  R31H10-DBD in sensory neurons of the wings and halteres. Native GFP fluorescence is shown in green and autofluorescence from the cuticle is in magenta. Maximum intensity projections are shown. The proximal wing is to the right and the distal wing is to the left. (A) Sensory neurons on the wing. White boxes and letters indicate the regions shown in B–D. The different symbols indicate the sensory neuron types on the wing as proximal campaniform sensilla (white asterisks), distal campaniform sensilla (yellow asterisks), or bristle mechanosensory (white arrowheads). Scale bar, 250  $\mu$ m. (B–D) Larger images of the regions shown in A. Scale bars, 50  $\mu$ m. Shown are the proximal campaniform sensilla (B), distal campaniform sensilla (C), and bristle mechanosensory neurons (D). (E) Expression in the haltere campaniform sensilla (asterisks). Scale bar, 100  $\mu$ m (F) CNS expression visualized by co-stain with anti-GFP (green) and anti-Bruchpilot (magenta). Arrows indicate the CNS entry points of afferents from the wings and halteres, and the location of ascending projections from some of these afferents. Scale bar, 100  $\mu$ m. (G) Wing grooming bout rate with optogenetic activation of neurons targeted by R30B01-AD  $\cap$  R31H10-DBD. Data are displayed as described for Figure 3C. Asterisks:  $p < 0.0001$ .

DOI: <https://doi.org/10.7554/eLife.28804.016>

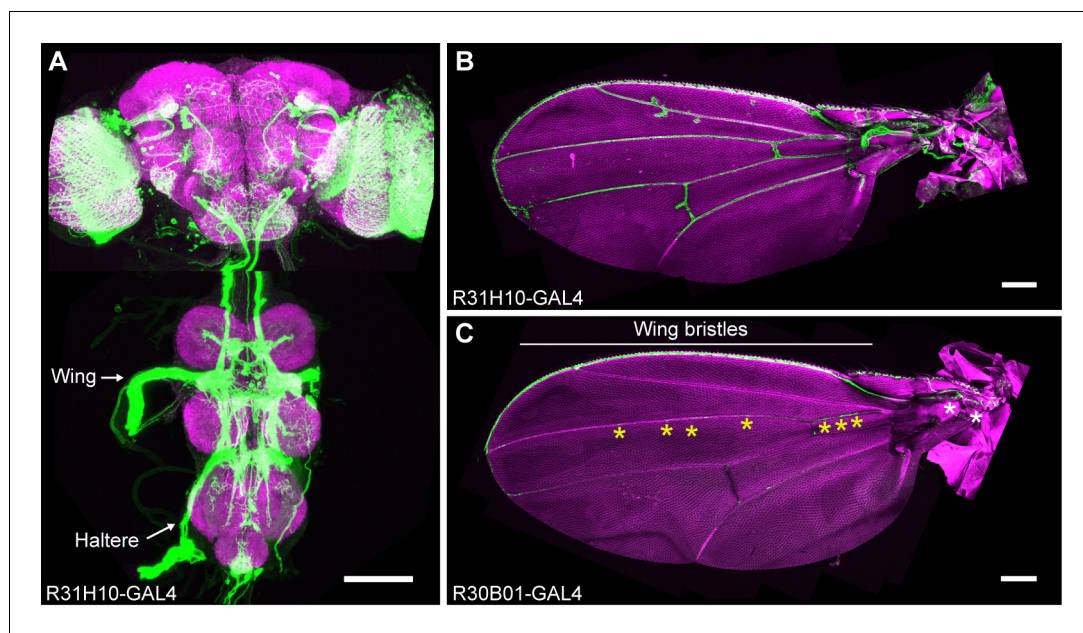

**Figure 4—figure supplement 1.** GAL4 lines that express in wing sensory neurons. CNS (A) and wing (B) expression patterns of R31H10-GAL4 that targets neurons whose activation elicits wing grooming. Maximum intensity projections are shown. (A) The CNS expression is visualized by co-staining with anti-GFP (green) and anti-Bruchpilot (magenta). Arrows indicate the CNS entry points of afferents from the wings and halteres. Scale bar, 100  $\mu$ m. (B) Wing expression pattern visualized using the native GFP fluorescence in green and autofluorescence from the cuticle in magenta. Scale bar, 250  $\mu$ m. (C) Wing expression pattern of R30B01-GAL4. The different symbols indicate the sensory neuron types on the wing as proximal campaniform sensilla (white asterisks), distal campaniform sensilla (yellow asterisks), or bristle mechanosensory (white line). Scale bar, 250  $\mu$ m.

DOI: <https://doi.org/10.7554/eLife.28804.017>

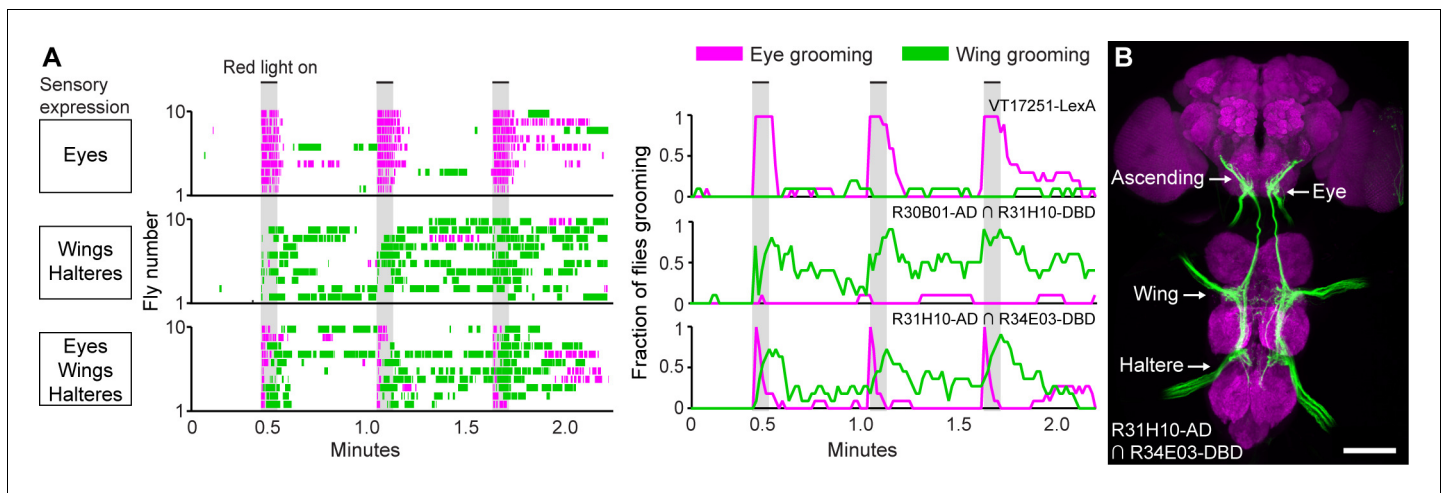

**Figure 5.** Simultaneous excitation of eye and wing/haltere sensory neurons produces sequential grooming. **(A)** Ethograms (left) and histograms (right) showing eye grooming (magenta) or wing grooming (green) elicited with red light-activated CsChrimson expressed in different transgenic lines. The lines express in sensory neurons on the eyes (VT17251-LexA (top row)), wings and halteres (R30B01-AD  $\cap$  R31H10-DBD (middle row)), or eyes, wings, and halteres (R31H10-AD  $\cap$  R34E03-DBD (bottom row)). Data is plotted as described in **Figure 2**. See **Video 6**, **Video 7**, and **Video 8** for representative examples. **(B)** GFP expression pattern of R31H10-AD  $\cap$  R34E03-DBD in the CNS. Image shows a maximum intensity projection of a co-stain with anti-GFP (green) and anti-Bruchpilot (magenta). Arrows indicate the body part each sensory projection is from, and the location of ascending projections from the wings and halteres. Scale bars, 100  $\mu$ m.

DOI: <https://doi.org/10.7554/eLife.28804.018>

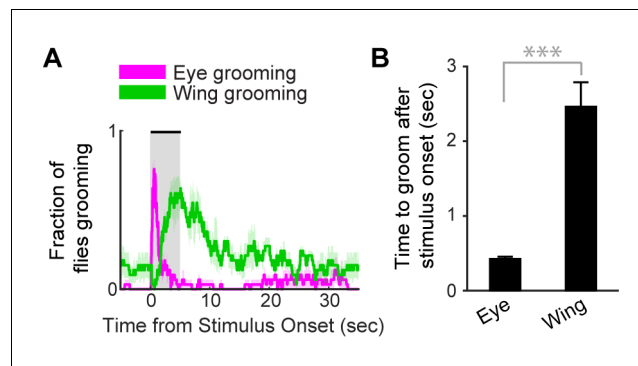

**Figure 5—figure supplement 1.** Simultaneous excitation of eye and wing/haltere sensory neurons produces sequential grooming. (A) The mean fraction of flies performing head or posterior grooming for each frame before, during, and after the three different stimuli shown in **Figure 5A** (bottom). The envelope shows the standard error of the mean. The spGAL4 line (R31H10-AD  $\cap$  R34E03-DBD) expresses CsChrimson in sensory neurons on the eyes, wings, and halteres. (B) The average time to perform head or posterior body grooming after the stimulus onset. Error bars indicate standard error of the mean. Statistical significance was assessed using a Mann-Whitney U test (\*\*p<0.0001).

DOI: <https://doi.org/10.7554/eLife.28804.019>
